# Supplementary material
Source: PubMed Central journal article supplement (PMC8588669)
Supplement: 12889_2021_12053_MOESM1_ESM.pdf [file 12889_2021_12053_MOESM1_ESM.pdf]

**Instructions**

- Complete this form using a pen or pencil.
- Check entire box; print squarely in boxes and above lines.

Correct  
 **AB**

Incorrect  
  ~~AB~~

|  |  |  |  |  |  |
|--|--|--|--|--|--|
|  |  |  |  |  |  |
|--|--|--|--|--|--|

**SECTION 1 OPERATORS**

1. Is your operation primarily a farm or a ranch?  Farm  Ranch  Both

2. Please answer the following questions for up to three **primary operators** (individuals) on this operation as of today.

|                                                                                                                            | Principal Operator                                                                                                                                                       | Operator 2                                                                                                                                                               | Operator 3                                                                                                                                                               |
|----------------------------------------------------------------------------------------------------------------------------|--------------------------------------------------------------------------------------------------------------------------------------------------------------------------|--------------------------------------------------------------------------------------------------------------------------------------------------------------------------|--------------------------------------------------------------------------------------------------------------------------------------------------------------------------|
| a. What is the operator's age?                                                                                             | <input type="text"/> <input type="text"/> Years                                                                                                                          | <input type="text"/> <input type="text"/> Years                                                                                                                          | <input type="text"/> <input type="text"/> Years                                                                                                                          |
| b. Sex of operator?                                                                                                        | <input type="checkbox"/> Male <input type="checkbox"/> Female                                                                                                            | <input type="checkbox"/> Male <input type="checkbox"/> Female                                                                                                            | <input type="checkbox"/> Male <input type="checkbox"/> Female                                                                                                            |
| c. At which occupation did the operator spend the majority (50% or more) of his/her worktime in the past 12 months?        | <input type="checkbox"/> Farm/ranch work<br><input type="checkbox"/> Other                                                                                               | <input type="checkbox"/> Farm/ranch work<br><input type="checkbox"/> Other                                                                                               | <input type="checkbox"/> Farm/ranch work<br><input type="checkbox"/> Other                                                                                               |
| d. What percentage of this operator's worktime was spent working on the farm/ranch in the past 12 months? (Mark only one.) | <input type="checkbox"/> 100%<br><input type="checkbox"/> 75-99%<br><input type="checkbox"/> 50-74%<br><input type="checkbox"/> 25-49%<br><input type="checkbox"/> 0-24% | <input type="checkbox"/> 100%<br><input type="checkbox"/> 75-99%<br><input type="checkbox"/> 50-74%<br><input type="checkbox"/> 25-49%<br><input type="checkbox"/> 0-24% | <input type="checkbox"/> 100%<br><input type="checkbox"/> 75-99%<br><input type="checkbox"/> 50-74%<br><input type="checkbox"/> 25-49%<br><input type="checkbox"/> 0-24% |

**SECTION 2 ACUTE INJURIES TO OPERATORS**

Definitions: "Injury" is the result of a sudden, unexpected, forceful event, which has an external cause, and which results in bodily damage or loss of consciousness. "Farm-related" includes work and leisure activities on this operation, plus commuting, transport, and business trips for this operation.

|                                                                                        | Principal Operator                                                                                                                      | Operator 2                                                                                                                              | Operator 3                                                                                                                              |
|----------------------------------------------------------------------------------------|-----------------------------------------------------------------------------------------------------------------------------------------|-----------------------------------------------------------------------------------------------------------------------------------------|-----------------------------------------------------------------------------------------------------------------------------------------|
| 3. How many farm-related injuries occurred to each operator during the past 12 months? | <input type="checkbox"/> None<br><input type="checkbox"/> One<br><input type="checkbox"/> Two<br><input type="checkbox"/> Three or more | <input type="checkbox"/> None<br><input type="checkbox"/> One<br><input type="checkbox"/> Two<br><input type="checkbox"/> Three or more | <input type="checkbox"/> None<br><input type="checkbox"/> One<br><input type="checkbox"/> Two<br><input type="checkbox"/> Three or more |

The following questions are about the **most serious injury** to each operator. (If no injuries in past 12 months, skip to Section 3.)

|                                                                                |                                                                                                                                                                                                          |                                                                                                                                                                                                          |                                                                                                                                                                                                          |
|--------------------------------------------------------------------------------|----------------------------------------------------------------------------------------------------------------------------------------------------------------------------------------------------------|----------------------------------------------------------------------------------------------------------------------------------------------------------------------------------------------------------|----------------------------------------------------------------------------------------------------------------------------------------------------------------------------------------------------------|
| 4. In what month did the most serious injury occur?                            | Month (1-12)<br><input type="text"/> <input type="text"/>                                                                                                                                                | Month (1-12)<br><input type="text"/> <input type="text"/>                                                                                                                                                | Month (1-12)<br><input type="text"/> <input type="text"/>                                                                                                                                                |
| 5. Did the injury happen during farm-related work or leisure? (Mark only one.) | <input type="checkbox"/> Work<br><input type="checkbox"/> Leisure                                                                                                                                        | <input type="checkbox"/> Work<br><input type="checkbox"/> Leisure                                                                                                                                        | <input type="checkbox"/> Work<br><input type="checkbox"/> Leisure                                                                                                                                        |
| 6. Where did this injury occur? (Mark only one.)                               | <input type="checkbox"/> Home/office<br><input type="checkbox"/> Farm building<br><input type="checkbox"/> Farm yard<br><input type="checkbox"/> Field/pasture<br><input type="checkbox"/> Road/off-farm | <input type="checkbox"/> Home/office<br><input type="checkbox"/> Farm building<br><input type="checkbox"/> Farm yard<br><input type="checkbox"/> Field/pasture<br><input type="checkbox"/> Road/off-farm | <input type="checkbox"/> Home/office<br><input type="checkbox"/> Farm building<br><input type="checkbox"/> Farm yard<br><input type="checkbox"/> Field/pasture<br><input type="checkbox"/> Road/off-farm |

|                                                                                                                                    | Principal Operator                                                                                                                                                                                                                                                                                                                                                                                                                            | Operator 2                                                                                                                                                                                                                                                                                                                                                                                                                                    | Operator 3                                                                                                                                                                                                                                                                                                                                                                                                                                    |  |  |  |  |    |  |  |  |  |  |                |  |  |  |  |  |    |  |  |  |  |  |                                                                                                                                                                                                                                                          |               |  |  |  |  |  |    |  |  |  |  |  |                |  |  |  |  |  |    |  |  |  |  |  |                                                                                                                                                                                                                                                          |               |  |  |  |  |  |    |  |  |  |  |  |                |  |  |  |  |  |    |  |  |  |  |  |
|------------------------------------------------------------------------------------------------------------------------------------|-----------------------------------------------------------------------------------------------------------------------------------------------------------------------------------------------------------------------------------------------------------------------------------------------------------------------------------------------------------------------------------------------------------------------------------------------|-----------------------------------------------------------------------------------------------------------------------------------------------------------------------------------------------------------------------------------------------------------------------------------------------------------------------------------------------------------------------------------------------------------------------------------------------|-----------------------------------------------------------------------------------------------------------------------------------------------------------------------------------------------------------------------------------------------------------------------------------------------------------------------------------------------------------------------------------------------------------------------------------------------|--|--|--|--|----|--|--|--|--|--|----------------|--|--|--|--|--|----|--|--|--|--|--|----------------------------------------------------------------------------------------------------------------------------------------------------------------------------------------------------------------------------------------------------------|---------------|--|--|--|--|--|----|--|--|--|--|--|----------------|--|--|--|--|--|----|--|--|--|--|--|----------------------------------------------------------------------------------------------------------------------------------------------------------------------------------------------------------------------------------------------------------|---------------|--|--|--|--|--|----|--|--|--|--|--|----------------|--|--|--|--|--|----|--|--|--|--|--|
| 7. What was the primary object or substance that caused this injury? (Mark only one).                                              | <input type="checkbox"/> Tractor<br><input type="checkbox"/> ATV<br><input type="checkbox"/> Machinery<br><input type="checkbox"/> Truck/other vehicle<br><input type="checkbox"/> Power tool<br><input type="checkbox"/> Hand tool<br><input type="checkbox"/> Building/structure<br><input type="checkbox"/> Ground/floor/surface<br><input type="checkbox"/> Livestock<br><input type="checkbox"/> Other, specify:<br><input type="text"/> | <input type="checkbox"/> Tractor<br><input type="checkbox"/> ATV<br><input type="checkbox"/> Machinery<br><input type="checkbox"/> Truck/other vehicle<br><input type="checkbox"/> Power tool<br><input type="checkbox"/> Hand tool<br><input type="checkbox"/> Building/structure<br><input type="checkbox"/> Ground/floor/surface<br><input type="checkbox"/> Livestock<br><input type="checkbox"/> Other, specify:<br><input type="text"/> | <input type="checkbox"/> Tractor<br><input type="checkbox"/> ATV<br><input type="checkbox"/> Machinery<br><input type="checkbox"/> Truck/other vehicle<br><input type="checkbox"/> Power tool<br><input type="checkbox"/> Hand tool<br><input type="checkbox"/> Building/structure<br><input type="checkbox"/> Ground/floor/surface<br><input type="checkbox"/> Livestock<br><input type="checkbox"/> Other, specify:<br><input type="text"/> |  |  |  |  |    |  |  |  |  |  |                |  |  |  |  |  |    |  |  |  |  |  |                                                                                                                                                                                                                                                          |               |  |  |  |  |  |    |  |  |  |  |  |                |  |  |  |  |  |    |  |  |  |  |  |                                                                                                                                                                                                                                                          |               |  |  |  |  |  |    |  |  |  |  |  |                |  |  |  |  |  |    |  |  |  |  |  |
| 8. What body part was injured? (Mark all that apply.)                                                                              | <input type="checkbox"/> Eye/head/neck<br><input type="checkbox"/> Chest/trunk<br><input type="checkbox"/> Back<br><input type="checkbox"/> Arm/shoulder<br><input type="checkbox"/> Finger<br><input type="checkbox"/> Hand/wrist<br><input type="checkbox"/> Leg/knee/hip<br><input type="checkbox"/> Ankle/foot/toe<br><input type="checkbox"/> Other, specify:<br><input type="text"/>                                                    | <input type="checkbox"/> Eye/head/neck<br><input type="checkbox"/> Chest/trunk<br><input type="checkbox"/> Back<br><input type="checkbox"/> Arm/shoulder<br><input type="checkbox"/> Finger<br><input type="checkbox"/> Hand/wrist<br><input type="checkbox"/> Leg/knee/hip<br><input type="checkbox"/> Ankle/foot/toe<br><input type="checkbox"/> Other, specify:<br><input type="text"/>                                                    | <input type="checkbox"/> Eye/head/neck<br><input type="checkbox"/> Chest/trunk<br><input type="checkbox"/> Back<br><input type="checkbox"/> Arm/shoulder<br><input type="checkbox"/> Finger<br><input type="checkbox"/> Hand/wrist<br><input type="checkbox"/> Leg/knee/hip<br><input type="checkbox"/> Ankle/foot/toe<br><input type="checkbox"/> Other, specify:<br><input type="text"/>                                                    |  |  |  |  |    |  |  |  |  |  |                |  |  |  |  |  |    |  |  |  |  |  |                                                                                                                                                                                                                                                          |               |  |  |  |  |  |    |  |  |  |  |  |                |  |  |  |  |  |    |  |  |  |  |  |                                                                                                                                                                                                                                                          |               |  |  |  |  |  |    |  |  |  |  |  |                |  |  |  |  |  |    |  |  |  |  |  |
| 9. What professional medical care did this injury require? (Mark all that apply.)                                                  | <input type="checkbox"/> None<br><input type="checkbox"/> Doctor/clinic visit<br><input type="checkbox"/> Hospitalization                                                                                                                                                                                                                                                                                                                     | <input type="checkbox"/> None<br><input type="checkbox"/> Doctor/clinic visit<br><input type="checkbox"/> Hospitalization                                                                                                                                                                                                                                                                                                                     | <input type="checkbox"/> None<br><input type="checkbox"/> Doctor/clinic visit<br><input type="checkbox"/> Hospitalization                                                                                                                                                                                                                                                                                                                     |  |  |  |  |    |  |  |  |  |  |                |  |  |  |  |  |    |  |  |  |  |  |                                                                                                                                                                                                                                                          |               |  |  |  |  |  |    |  |  |  |  |  |                |  |  |  |  |  |    |  |  |  |  |  |                                                                                                                                                                                                                                                          |               |  |  |  |  |  |    |  |  |  |  |  |                |  |  |  |  |  |    |  |  |  |  |  |
| 10. How much lost farm/ranch work time resulted from this injury? (Mark only one.)                                                 | <input type="checkbox"/> No lost time<br><input type="checkbox"/> Less than 1/2 day<br><input type="checkbox"/> 1/2 to 1 day<br><input type="checkbox"/> 2 to 6 days<br><input type="checkbox"/> 7-29 days<br><input type="checkbox"/> 30 days or more                                                                                                                                                                                        | <input type="checkbox"/> No lost time<br><input type="checkbox"/> Less than 1/2 day<br><input type="checkbox"/> 1/2 to 1 day<br><input type="checkbox"/> 2 to 6 days<br><input type="checkbox"/> 7-29 days<br><input type="checkbox"/> 30 days or more                                                                                                                                                                                        | <input type="checkbox"/> No lost time<br><input type="checkbox"/> Less than 1/2 day<br><input type="checkbox"/> 1/2 to 1 day<br><input type="checkbox"/> 2 to 6 days<br><input type="checkbox"/> 7-29 days<br><input type="checkbox"/> 30 days or more                                                                                                                                                                                        |  |  |  |  |    |  |  |  |  |  |                |  |  |  |  |  |    |  |  |  |  |  |                                                                                                                                                                                                                                                          |               |  |  |  |  |  |    |  |  |  |  |  |                |  |  |  |  |  |    |  |  |  |  |  |                                                                                                                                                                                                                                                          |               |  |  |  |  |  |    |  |  |  |  |  |                |  |  |  |  |  |    |  |  |  |  |  |
| 11. What were the estimated costs from this injury, including out-of-pocket costs and costs paid by insurance? (Mark '0' if none.) | <table border="1"> <tr><td colspan="6">Out-of-pocket</td></tr> <tr><td>\$</td><td></td><td></td><td></td><td></td><td></td></tr> <tr><td colspan="6">Insurance paid</td></tr> <tr><td>\$</td><td></td><td></td><td></td><td></td><td></td></tr> </table>                                                                                                                                                                                      | Out-of-pocket                                                                                                                                                                                                                                                                                                                                                                                                                                 |                                                                                                                                                                                                                                                                                                                                                                                                                                               |  |  |  |  | \$ |  |  |  |  |  | Insurance paid |  |  |  |  |  | \$ |  |  |  |  |  | <table border="1"> <tr><td colspan="6">Out-of-pocket</td></tr> <tr><td>\$</td><td></td><td></td><td></td><td></td><td></td></tr> <tr><td colspan="6">Insurance paid</td></tr> <tr><td>\$</td><td></td><td></td><td></td><td></td><td></td></tr> </table> | Out-of-pocket |  |  |  |  |  | \$ |  |  |  |  |  | Insurance paid |  |  |  |  |  | \$ |  |  |  |  |  | <table border="1"> <tr><td colspan="6">Out-of-pocket</td></tr> <tr><td>\$</td><td></td><td></td><td></td><td></td><td></td></tr> <tr><td colspan="6">Insurance paid</td></tr> <tr><td>\$</td><td></td><td></td><td></td><td></td><td></td></tr> </table> | Out-of-pocket |  |  |  |  |  | \$ |  |  |  |  |  | Insurance paid |  |  |  |  |  | \$ |  |  |  |  |  |
| Out-of-pocket                                                                                                                      |                                                                                                                                                                                                                                                                                                                                                                                                                                               |                                                                                                                                                                                                                                                                                                                                                                                                                                               |                                                                                                                                                                                                                                                                                                                                                                                                                                               |  |  |  |  |    |  |  |  |  |  |                |  |  |  |  |  |    |  |  |  |  |  |                                                                                                                                                                                                                                                          |               |  |  |  |  |  |    |  |  |  |  |  |                |  |  |  |  |  |    |  |  |  |  |  |                                                                                                                                                                                                                                                          |               |  |  |  |  |  |    |  |  |  |  |  |                |  |  |  |  |  |    |  |  |  |  |  |
| \$                                                                                                                                 |                                                                                                                                                                                                                                                                                                                                                                                                                                               |                                                                                                                                                                                                                                                                                                                                                                                                                                               |                                                                                                                                                                                                                                                                                                                                                                                                                                               |  |  |  |  |    |  |  |  |  |  |                |  |  |  |  |  |    |  |  |  |  |  |                                                                                                                                                                                                                                                          |               |  |  |  |  |  |    |  |  |  |  |  |                |  |  |  |  |  |    |  |  |  |  |  |                                                                                                                                                                                                                                                          |               |  |  |  |  |  |    |  |  |  |  |  |                |  |  |  |  |  |    |  |  |  |  |  |
| Insurance paid                                                                                                                     |                                                                                                                                                                                                                                                                                                                                                                                                                                               |                                                                                                                                                                                                                                                                                                                                                                                                                                               |                                                                                                                                                                                                                                                                                                                                                                                                                                               |  |  |  |  |    |  |  |  |  |  |                |  |  |  |  |  |    |  |  |  |  |  |                                                                                                                                                                                                                                                          |               |  |  |  |  |  |    |  |  |  |  |  |                |  |  |  |  |  |    |  |  |  |  |  |                                                                                                                                                                                                                                                          |               |  |  |  |  |  |    |  |  |  |  |  |                |  |  |  |  |  |    |  |  |  |  |  |
| \$                                                                                                                                 |                                                                                                                                                                                                                                                                                                                                                                                                                                               |                                                                                                                                                                                                                                                                                                                                                                                                                                               |                                                                                                                                                                                                                                                                                                                                                                                                                                               |  |  |  |  |    |  |  |  |  |  |                |  |  |  |  |  |    |  |  |  |  |  |                                                                                                                                                                                                                                                          |               |  |  |  |  |  |    |  |  |  |  |  |                |  |  |  |  |  |    |  |  |  |  |  |                                                                                                                                                                                                                                                          |               |  |  |  |  |  |    |  |  |  |  |  |                |  |  |  |  |  |    |  |  |  |  |  |
| Out-of-pocket                                                                                                                      |                                                                                                                                                                                                                                                                                                                                                                                                                                               |                                                                                                                                                                                                                                                                                                                                                                                                                                               |                                                                                                                                                                                                                                                                                                                                                                                                                                               |  |  |  |  |    |  |  |  |  |  |                |  |  |  |  |  |    |  |  |  |  |  |                                                                                                                                                                                                                                                          |               |  |  |  |  |  |    |  |  |  |  |  |                |  |  |  |  |  |    |  |  |  |  |  |                                                                                                                                                                                                                                                          |               |  |  |  |  |  |    |  |  |  |  |  |                |  |  |  |  |  |    |  |  |  |  |  |
| \$                                                                                                                                 |                                                                                                                                                                                                                                                                                                                                                                                                                                               |                                                                                                                                                                                                                                                                                                                                                                                                                                               |                                                                                                                                                                                                                                                                                                                                                                                                                                               |  |  |  |  |    |  |  |  |  |  |                |  |  |  |  |  |    |  |  |  |  |  |                                                                                                                                                                                                                                                          |               |  |  |  |  |  |    |  |  |  |  |  |                |  |  |  |  |  |    |  |  |  |  |  |                                                                                                                                                                                                                                                          |               |  |  |  |  |  |    |  |  |  |  |  |                |  |  |  |  |  |    |  |  |  |  |  |
| Insurance paid                                                                                                                     |                                                                                                                                                                                                                                                                                                                                                                                                                                               |                                                                                                                                                                                                                                                                                                                                                                                                                                               |                                                                                                                                                                                                                                                                                                                                                                                                                                               |  |  |  |  |    |  |  |  |  |  |                |  |  |  |  |  |    |  |  |  |  |  |                                                                                                                                                                                                                                                          |               |  |  |  |  |  |    |  |  |  |  |  |                |  |  |  |  |  |    |  |  |  |  |  |                                                                                                                                                                                                                                                          |               |  |  |  |  |  |    |  |  |  |  |  |                |  |  |  |  |  |    |  |  |  |  |  |
| \$                                                                                                                                 |                                                                                                                                                                                                                                                                                                                                                                                                                                               |                                                                                                                                                                                                                                                                                                                                                                                                                                               |                                                                                                                                                                                                                                                                                                                                                                                                                                               |  |  |  |  |    |  |  |  |  |  |                |  |  |  |  |  |    |  |  |  |  |  |                                                                                                                                                                                                                                                          |               |  |  |  |  |  |    |  |  |  |  |  |                |  |  |  |  |  |    |  |  |  |  |  |                                                                                                                                                                                                                                                          |               |  |  |  |  |  |    |  |  |  |  |  |                |  |  |  |  |  |    |  |  |  |  |  |
| Out-of-pocket                                                                                                                      |                                                                                                                                                                                                                                                                                                                                                                                                                                               |                                                                                                                                                                                                                                                                                                                                                                                                                                               |                                                                                                                                                                                                                                                                                                                                                                                                                                               |  |  |  |  |    |  |  |  |  |  |                |  |  |  |  |  |    |  |  |  |  |  |                                                                                                                                                                                                                                                          |               |  |  |  |  |  |    |  |  |  |  |  |                |  |  |  |  |  |    |  |  |  |  |  |                                                                                                                                                                                                                                                          |               |  |  |  |  |  |    |  |  |  |  |  |                |  |  |  |  |  |    |  |  |  |  |  |
| \$                                                                                                                                 |                                                                                                                                                                                                                                                                                                                                                                                                                                               |                                                                                                                                                                                                                                                                                                                                                                                                                                               |                                                                                                                                                                                                                                                                                                                                                                                                                                               |  |  |  |  |    |  |  |  |  |  |                |  |  |  |  |  |    |  |  |  |  |  |                                                                                                                                                                                                                                                          |               |  |  |  |  |  |    |  |  |  |  |  |                |  |  |  |  |  |    |  |  |  |  |  |                                                                                                                                                                                                                                                          |               |  |  |  |  |  |    |  |  |  |  |  |                |  |  |  |  |  |    |  |  |  |  |  |
| Insurance paid                                                                                                                     |                                                                                                                                                                                                                                                                                                                                                                                                                                               |                                                                                                                                                                                                                                                                                                                                                                                                                                               |                                                                                                                                                                                                                                                                                                                                                                                                                                               |  |  |  |  |    |  |  |  |  |  |                |  |  |  |  |  |    |  |  |  |  |  |                                                                                                                                                                                                                                                          |               |  |  |  |  |  |    |  |  |  |  |  |                |  |  |  |  |  |    |  |  |  |  |  |                                                                                                                                                                                                                                                          |               |  |  |  |  |  |    |  |  |  |  |  |                |  |  |  |  |  |    |  |  |  |  |  |
| \$                                                                                                                                 |                                                                                                                                                                                                                                                                                                                                                                                                                                               |                                                                                                                                                                                                                                                                                                                                                                                                                                               |                                                                                                                                                                                                                                                                                                                                                                                                                                               |  |  |  |  |    |  |  |  |  |  |                |  |  |  |  |  |    |  |  |  |  |  |                                                                                                                                                                                                                                                          |               |  |  |  |  |  |    |  |  |  |  |  |                |  |  |  |  |  |    |  |  |  |  |  |                                                                                                                                                                                                                                                          |               |  |  |  |  |  |    |  |  |  |  |  |                |  |  |  |  |  |    |  |  |  |  |  |
| 12. Please describe how the injury happened.<br>**Use space at the end of the survey for additional detail if needed.              | <input type="text"/>                                                                                                                                                                                                                                                                                                                                                                                                                          | <input type="text"/>                                                                                                                                                                                                                                                                                                                                                                                                                          | <input type="text"/>                                                                                                                                                                                                                                                                                                                                                                                                                          |  |  |  |  |    |  |  |  |  |  |                |  |  |  |  |  |    |  |  |  |  |  |                                                                                                                                                                                                                                                          |               |  |  |  |  |  |    |  |  |  |  |  |                |  |  |  |  |  |    |  |  |  |  |  |                                                                                                                                                                                                                                                          |               |  |  |  |  |  |    |  |  |  |  |  |                |  |  |  |  |  |    |  |  |  |  |  |

**SECTION 3 CHILDREN, YOUTH AND FAMILY MEMBERS**

|                                                                                                                                                             | Number of persons                         | How many of them were injured?            |
|-------------------------------------------------------------------------------------------------------------------------------------------------------------|-------------------------------------------|-------------------------------------------|
| 13. How many children, youth and adult family members lived on this farm/ranch during the past 12 months? (Including operators listed in previous sections) | (mark '0' if none)                        | (mark '0' if none)                        |
| a. Children 0 - 9 years of age ----->                                                                                                                       | <input type="text"/> <input type="text"/> | <input type="text"/> <input type="text"/> |
| b. Youth 10 - 19 years of age ----->                                                                                                                        | <input type="text"/> <input type="text"/> | <input type="text"/> <input type="text"/> |
| c. Adults 20 - 64 years of age ----->                                                                                                                       | <input type="text"/> <input type="text"/> | <input type="text"/> <input type="text"/> |
| d. Adults 65 years of age and older ----->                                                                                                                  | <input type="text"/> <input type="text"/> | <input type="text"/> <input type="text"/> |

**SECTION 4 HIRED WORKERS**

|                                                                                     | Number of persons                         | How many of them were injured?            |
|-------------------------------------------------------------------------------------|-------------------------------------------|-------------------------------------------|
| 14. How many hired farm workers, including paid family members and office workers - | (mark '0' if none)                        | (mark '0' if none)                        |
| a. Worked less than 150 days on this operation during the past 12 months?           | <input type="text"/> <input type="text"/> | <input type="text"/> <input type="text"/> |
| b. Worked 150 days or more on this operation during the past 12 months?             | <input type="text"/> <input type="text"/> | <input type="text"/> <input type="text"/> |

**SECTION 5 CHRONIC HEALTH CONDITIONS TO OPERATORS**

|                                                                                                                                                                                  | Principal Operator                                                                                                                                                                                                                                                                                                                                         | Operator 2                                                                                                                                                                                                                                                                                                                                                 | Operator 3                                                                                                                                                                                                                                                                                                                                                 |
|----------------------------------------------------------------------------------------------------------------------------------------------------------------------------------|------------------------------------------------------------------------------------------------------------------------------------------------------------------------------------------------------------------------------------------------------------------------------------------------------------------------------------------------------------|------------------------------------------------------------------------------------------------------------------------------------------------------------------------------------------------------------------------------------------------------------------------------------------------------------------------------------------------------------|------------------------------------------------------------------------------------------------------------------------------------------------------------------------------------------------------------------------------------------------------------------------------------------------------------------------------------------------------------|
| 15. <b>Respiratory diseases:</b><br>Has the operator ever been diagnosed by a physician with any of the following respiratory conditions?<br>(Mark all that apply.)              | <input type="checkbox"/> None<br><input type="checkbox"/> Chronic obstructive pulmonary dis. (COPD)<br><input type="checkbox"/> Asthma<br><input type="checkbox"/> Farmers lung<br><input type="checkbox"/> Sinus disease (Sinusitis)<br><input type="checkbox"/> Nasal inflammation, runny nose (Rhinitis)<br><input type="checkbox"/> Environ. allergies | <input type="checkbox"/> None<br><input type="checkbox"/> Chronic obstructive pulmonary dis. (COPD)<br><input type="checkbox"/> Asthma<br><input type="checkbox"/> Farmers lung<br><input type="checkbox"/> Sinus disease (Sinusitis)<br><input type="checkbox"/> Nasal inflammation, runny nose (Rhinitis)<br><input type="checkbox"/> Environ. allergies | <input type="checkbox"/> None<br><input type="checkbox"/> Chronic obstructive pulmonary dis. (COPD)<br><input type="checkbox"/> Asthma<br><input type="checkbox"/> Farmers lung<br><input type="checkbox"/> Sinus disease (Sinusitis)<br><input type="checkbox"/> Nasal inflammation, runny nose (Rhinitis)<br><input type="checkbox"/> Environ. allergies |
| 16. <b>Hearing loss:</b><br>Does the operator have hearing loss? (diagnosed or self-assessed)<br>(Mark only one.)                                                                | <input type="checkbox"/> None<br><input type="checkbox"/> Mild<br><input type="checkbox"/> Moderate<br><input type="checkbox"/> Severe                                                                                                                                                                                                                     | <input type="checkbox"/> None<br><input type="checkbox"/> Mild<br><input type="checkbox"/> Moderate<br><input type="checkbox"/> Severe                                                                                                                                                                                                                     | <input type="checkbox"/> None<br><input type="checkbox"/> Mild<br><input type="checkbox"/> Moderate<br><input type="checkbox"/> Severe                                                                                                                                                                                                                     |
| 17. <b>Skin diseases:</b><br>Has the operator ever been diagnosed by a physician with any of the following skin conditions?<br>(Mark all that apply.)                            | <input type="checkbox"/> None<br><input type="checkbox"/> Irritant dermatitis<br><input type="checkbox"/> Allergic dermatitis<br><input type="checkbox"/> Skin cancer<br><input type="checkbox"/> Other, specify:<br><input type="text"/>                                                                                                                  | <input type="checkbox"/> None<br><input type="checkbox"/> Irritant dermatitis<br><input type="checkbox"/> Allergic dermatitis<br><input type="checkbox"/> Skin cancer<br><input type="checkbox"/> Other, specify:<br><input type="text"/>                                                                                                                  | <input type="checkbox"/> None<br><input type="checkbox"/> Irritant dermatitis<br><input type="checkbox"/> Allergic dermatitis<br><input type="checkbox"/> Skin cancer<br><input type="checkbox"/> Other, specify:<br><input type="text"/>                                                                                                                  |
| 18. <b>Work strain symptoms:</b><br>Did the operator experience extended work periods that resulted in any of the following during the past 12 months?<br>(Mark all that apply.) | <input type="checkbox"/> None<br><input type="checkbox"/> High stress level<br><input type="checkbox"/> Sleep deprivation<br><input type="checkbox"/> Exhaustion/fatigue<br><input type="checkbox"/> Other, specify:<br><input type="text"/>                                                                                                               | <input type="checkbox"/> None<br><input type="checkbox"/> High stress level<br><input type="checkbox"/> Sleep deprivation<br><input type="checkbox"/> Exhaustion/fatigue<br><input type="checkbox"/> Other, specify:<br><input type="text"/>                                                                                                               | <input type="checkbox"/> None<br><input type="checkbox"/> High stress level<br><input type="checkbox"/> Sleep deprivation<br><input type="checkbox"/> Exhaustion/fatigue<br><input type="checkbox"/> Other, specify:<br><input type="text"/>                                                                                                               |

|                                                                                                                                                                                                                                                                                                    | Principal Operator                                                                                                                                                                                                                                                                                                                                                           | Operator 2                                                                                                                                                                                                                                                                                                                                                                   | Operator 3                                                                                                                                                                                                                                                                                                                                                                   |
|----------------------------------------------------------------------------------------------------------------------------------------------------------------------------------------------------------------------------------------------------------------------------------------------------|------------------------------------------------------------------------------------------------------------------------------------------------------------------------------------------------------------------------------------------------------------------------------------------------------------------------------------------------------------------------------|------------------------------------------------------------------------------------------------------------------------------------------------------------------------------------------------------------------------------------------------------------------------------------------------------------------------------------------------------------------------------|------------------------------------------------------------------------------------------------------------------------------------------------------------------------------------------------------------------------------------------------------------------------------------------------------------------------------------------------------------------------------|
| <p>19. <b>Musculoskeletal discomfort:</b><br/>Did the operator experience pain or discomfort that affected his/her work in any of the following body areas during the past 12 months? (Mark all that apply.)</p> 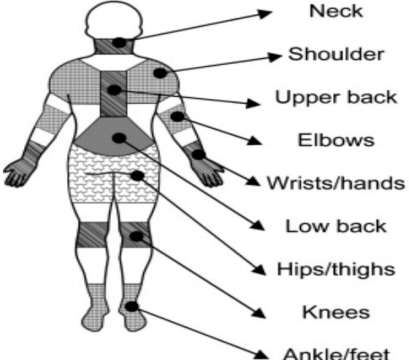 | <input type="checkbox"/> None<br><input type="checkbox"/> Neck<br><input type="checkbox"/> Shoulder<br><input type="checkbox"/> Upper back<br><input type="checkbox"/> Elbows<br><input type="checkbox"/> Wrists/hands<br><input type="checkbox"/> Low back<br><input type="checkbox"/> Hips/thighs<br><input type="checkbox"/> Knees<br><input type="checkbox"/> Ankle/feet | <input type="checkbox"/> None<br><input type="checkbox"/> Neck<br><input type="checkbox"/> Shoulder<br><input type="checkbox"/> Upper back<br><input type="checkbox"/> Elbows<br><input type="checkbox"/> Wrists/hands<br><input type="checkbox"/> Low back<br><input type="checkbox"/> Hips/thighs<br><input type="checkbox"/> Knees<br><input type="checkbox"/> Ankle/feet | <input type="checkbox"/> None<br><input type="checkbox"/> Neck<br><input type="checkbox"/> Shoulder<br><input type="checkbox"/> Upper back<br><input type="checkbox"/> Elbows<br><input type="checkbox"/> Wrists/hands<br><input type="checkbox"/> Low back<br><input type="checkbox"/> Hips/thighs<br><input type="checkbox"/> Knees<br><input type="checkbox"/> Ankle/feet |

**SECTION 6 EXPOSURES TO OPERATORS**

|                                                                                                                                                                                                                                                                                                                                                                                                                                                                                                                                                                                 | Principal Operator                                                                                                                                                                                                                                                                                                                                                                              | Operator 2                                                                                                                                                                                                                                                                                                                                                                                      | Operator 3                                                                                                                                                                                                                                                                                                                                                                                      |  |  |  |  |                                                                                                                         |                    |  |  |  |  |  |                                                                                                                         |                    |  |  |  |  |  |
|---------------------------------------------------------------------------------------------------------------------------------------------------------------------------------------------------------------------------------------------------------------------------------------------------------------------------------------------------------------------------------------------------------------------------------------------------------------------------------------------------------------------------------------------------------------------------------|-------------------------------------------------------------------------------------------------------------------------------------------------------------------------------------------------------------------------------------------------------------------------------------------------------------------------------------------------------------------------------------------------|-------------------------------------------------------------------------------------------------------------------------------------------------------------------------------------------------------------------------------------------------------------------------------------------------------------------------------------------------------------------------------------------------|-------------------------------------------------------------------------------------------------------------------------------------------------------------------------------------------------------------------------------------------------------------------------------------------------------------------------------------------------------------------------------------------------|--|--|--|--|-------------------------------------------------------------------------------------------------------------------------|--------------------|--|--|--|--|--|-------------------------------------------------------------------------------------------------------------------------|--------------------|--|--|--|--|--|
| <p>20. <b>Respiratory exposures:</b><br/>Was the operator exposed to high levels of any of the following air contaminants during the past 12 months? (Mark all that apply.)</p> <input type="checkbox"/> None<br><input type="checkbox"/> Grain/feed/hay dust<br><input type="checkbox"/> Animal confinem. dust<br><input type="checkbox"/> Field/road dust<br><input type="checkbox"/> Manure/silage gases<br><input type="checkbox"/> Anhydrous ammonia<br><input type="checkbox"/> Fuels/solvents/paints<br><input type="checkbox"/> Other, specify:<br><input type="text"/> | <input type="checkbox"/> None<br><input type="checkbox"/> Grain/feed/hay dust<br><input type="checkbox"/> Animal confinem. dust<br><input type="checkbox"/> Field/road dust<br><input type="checkbox"/> Manure/silage gases<br><input type="checkbox"/> Anhydrous ammonia<br><input type="checkbox"/> Fuels/solvents/paints<br><input type="checkbox"/> Other, specify:<br><input type="text"/> | <input type="checkbox"/> None<br><input type="checkbox"/> Grain/feed/hay dust<br><input type="checkbox"/> Animal confinem. dust<br><input type="checkbox"/> Field/road dust<br><input type="checkbox"/> Manure/silage gases<br><input type="checkbox"/> Anhydrous ammonia<br><input type="checkbox"/> Fuels/solvents/paints<br><input type="checkbox"/> Other, specify:<br><input type="text"/> | <input type="checkbox"/> None<br><input type="checkbox"/> Grain/feed/hay dust<br><input type="checkbox"/> Animal confinem. dust<br><input type="checkbox"/> Field/road dust<br><input type="checkbox"/> Manure/silage gases<br><input type="checkbox"/> Anhydrous ammonia<br><input type="checkbox"/> Fuels/solvents/paints<br><input type="checkbox"/> Other, specify:<br><input type="text"/> |  |  |  |  |                                                                                                                         |                    |  |  |  |  |  |                                                                                                                         |                    |  |  |  |  |  |
| <p>21. When exposed to high levels of air contaminants at work, what percent (%) of that time did the operator use proper respiratory protection (incl. N95 dust mask, half mask with dust/gas filters)?</p>                                                                                                                                                                                                                                                                                                                                                                    | <table border="1"> <tr> <th colspan="3">Amount of Time (%)</th> </tr> <tr> <td></td> <td></td> <td></td> </tr> </table>                                                                                                                                                                                                                                                                         | Amount of Time (%)                                                                                                                                                                                                                                                                                                                                                                              |                                                                                                                                                                                                                                                                                                                                                                                                 |  |  |  |  | <table border="1"> <tr> <th colspan="3">Amount of Time (%)</th> </tr> <tr> <td></td> <td></td> <td></td> </tr> </table> | Amount of Time (%) |  |  |  |  |  | <table border="1"> <tr> <th colspan="3">Amount of Time (%)</th> </tr> <tr> <td></td> <td></td> <td></td> </tr> </table> | Amount of Time (%) |  |  |  |  |  |
| Amount of Time (%)                                                                                                                                                                                                                                                                                                                                                                                                                                                                                                                                                              |                                                                                                                                                                                                                                                                                                                                                                                                 |                                                                                                                                                                                                                                                                                                                                                                                                 |                                                                                                                                                                                                                                                                                                                                                                                                 |  |  |  |  |                                                                                                                         |                    |  |  |  |  |  |                                                                                                                         |                    |  |  |  |  |  |
|                                                                                                                                                                                                                                                                                                                                                                                                                                                                                                                                                                                 |                                                                                                                                                                                                                                                                                                                                                                                                 |                                                                                                                                                                                                                                                                                                                                                                                                 |                                                                                                                                                                                                                                                                                                                                                                                                 |  |  |  |  |                                                                                                                         |                    |  |  |  |  |  |                                                                                                                         |                    |  |  |  |  |  |
| Amount of Time (%)                                                                                                                                                                                                                                                                                                                                                                                                                                                                                                                                                              |                                                                                                                                                                                                                                                                                                                                                                                                 |                                                                                                                                                                                                                                                                                                                                                                                                 |                                                                                                                                                                                                                                                                                                                                                                                                 |  |  |  |  |                                                                                                                         |                    |  |  |  |  |  |                                                                                                                         |                    |  |  |  |  |  |
|                                                                                                                                                                                                                                                                                                                                                                                                                                                                                                                                                                                 |                                                                                                                                                                                                                                                                                                                                                                                                 |                                                                                                                                                                                                                                                                                                                                                                                                 |                                                                                                                                                                                                                                                                                                                                                                                                 |  |  |  |  |                                                                                                                         |                    |  |  |  |  |  |                                                                                                                         |                    |  |  |  |  |  |
| Amount of Time (%)                                                                                                                                                                                                                                                                                                                                                                                                                                                                                                                                                              |                                                                                                                                                                                                                                                                                                                                                                                                 |                                                                                                                                                                                                                                                                                                                                                                                                 |                                                                                                                                                                                                                                                                                                                                                                                                 |  |  |  |  |                                                                                                                         |                    |  |  |  |  |  |                                                                                                                         |                    |  |  |  |  |  |
|                                                                                                                                                                                                                                                                                                                                                                                                                                                                                                                                                                                 |                                                                                                                                                                                                                                                                                                                                                                                                 |                                                                                                                                                                                                                                                                                                                                                                                                 |                                                                                                                                                                                                                                                                                                                                                                                                 |  |  |  |  |                                                                                                                         |                    |  |  |  |  |  |                                                                                                                         |                    |  |  |  |  |  |
| <p>22. <b>Noise exposures:</b><br/>Was the operator exposed to high levels of noise from any of the following sources during the past 12 months? (Mark all that apply.)</p> <input type="checkbox"/> None<br><input type="checkbox"/> Tractors<br><input type="checkbox"/> Combines<br><input type="checkbox"/> Implements<br><input type="checkbox"/> Power tools<br><input type="checkbox"/> Animals<br><input type="checkbox"/> Firearms<br><input type="checkbox"/> Other, specify:<br><input type="text"/>                                                                 | <input type="checkbox"/> None<br><input type="checkbox"/> Tractors<br><input type="checkbox"/> Combines<br><input type="checkbox"/> Implements<br><input type="checkbox"/> Power tools<br><input type="checkbox"/> Animals<br><input type="checkbox"/> Firearms<br><input type="checkbox"/> Other, specify:<br><input type="text"/>                                                             | <input type="checkbox"/> None<br><input type="checkbox"/> Tractors<br><input type="checkbox"/> Combines<br><input type="checkbox"/> Implements<br><input type="checkbox"/> Power tools<br><input type="checkbox"/> Animals<br><input type="checkbox"/> Firearms<br><input type="checkbox"/> Other, specify:<br><input type="text"/>                                                             | <input type="checkbox"/> None<br><input type="checkbox"/> Tractors<br><input type="checkbox"/> Combines<br><input type="checkbox"/> Implements<br><input type="checkbox"/> Power tools<br><input type="checkbox"/> Animals<br><input type="checkbox"/> Firearms<br><input type="checkbox"/> Other, specify:<br><input type="text"/>                                                             |  |  |  |  |                                                                                                                         |                    |  |  |  |  |  |                                                                                                                         |                    |  |  |  |  |  |

|                                                                                                                                                                                       | Principal Operator                                                                                                                                                                                                                                                                                                                 | Operator 2                                                                                                                                                                                                                                                                                                                         | Operator 3                                                                                                                                                                                                                                                                                                                         |  |  |  |  |                                                                                                                         |                    |  |  |  |  |  |                                                                                                                         |                    |  |  |  |  |  |
|---------------------------------------------------------------------------------------------------------------------------------------------------------------------------------------|------------------------------------------------------------------------------------------------------------------------------------------------------------------------------------------------------------------------------------------------------------------------------------------------------------------------------------|------------------------------------------------------------------------------------------------------------------------------------------------------------------------------------------------------------------------------------------------------------------------------------------------------------------------------------|------------------------------------------------------------------------------------------------------------------------------------------------------------------------------------------------------------------------------------------------------------------------------------------------------------------------------------|--|--|--|--|-------------------------------------------------------------------------------------------------------------------------|--------------------|--|--|--|--|--|-------------------------------------------------------------------------------------------------------------------------|--------------------|--|--|--|--|--|
| 23. When exposed to high levels of noise at work, what percent (%) of that time did the operator use proper hearing protection (ear muffs or ear plugs)?                              | <table border="1"> <tr> <td colspan="3">Amount of Time (%)</td> </tr> <tr> <td></td> <td></td> <td></td> </tr> </table>                                                                                                                                                                                                            | Amount of Time (%)                                                                                                                                                                                                                                                                                                                 |                                                                                                                                                                                                                                                                                                                                    |  |  |  |  | <table border="1"> <tr> <td colspan="3">Amount of Time (%)</td> </tr> <tr> <td></td> <td></td> <td></td> </tr> </table> | Amount of Time (%) |  |  |  |  |  | <table border="1"> <tr> <td colspan="3">Amount of Time (%)</td> </tr> <tr> <td></td> <td></td> <td></td> </tr> </table> | Amount of Time (%) |  |  |  |  |  |
| Amount of Time (%)                                                                                                                                                                    |                                                                                                                                                                                                                                                                                                                                    |                                                                                                                                                                                                                                                                                                                                    |                                                                                                                                                                                                                                                                                                                                    |  |  |  |  |                                                                                                                         |                    |  |  |  |  |  |                                                                                                                         |                    |  |  |  |  |  |
|                                                                                                                                                                                       |                                                                                                                                                                                                                                                                                                                                    |                                                                                                                                                                                                                                                                                                                                    |                                                                                                                                                                                                                                                                                                                                    |  |  |  |  |                                                                                                                         |                    |  |  |  |  |  |                                                                                                                         |                    |  |  |  |  |  |
| Amount of Time (%)                                                                                                                                                                    |                                                                                                                                                                                                                                                                                                                                    |                                                                                                                                                                                                                                                                                                                                    |                                                                                                                                                                                                                                                                                                                                    |  |  |  |  |                                                                                                                         |                    |  |  |  |  |  |                                                                                                                         |                    |  |  |  |  |  |
|                                                                                                                                                                                       |                                                                                                                                                                                                                                                                                                                                    |                                                                                                                                                                                                                                                                                                                                    |                                                                                                                                                                                                                                                                                                                                    |  |  |  |  |                                                                                                                         |                    |  |  |  |  |  |                                                                                                                         |                    |  |  |  |  |  |
| Amount of Time (%)                                                                                                                                                                    |                                                                                                                                                                                                                                                                                                                                    |                                                                                                                                                                                                                                                                                                                                    |                                                                                                                                                                                                                                                                                                                                    |  |  |  |  |                                                                                                                         |                    |  |  |  |  |  |                                                                                                                         |                    |  |  |  |  |  |
|                                                                                                                                                                                       |                                                                                                                                                                                                                                                                                                                                    |                                                                                                                                                                                                                                                                                                                                    |                                                                                                                                                                                                                                                                                                                                    |  |  |  |  |                                                                                                                         |                    |  |  |  |  |  |                                                                                                                         |                    |  |  |  |  |  |
| 24. <b>Skin exposures:</b><br>Was the operator exposed to any of the following chemicals or animal based allergens while working during the past 12 months?<br>(Mark all that apply.) | <input type="checkbox"/> None<br><input type="checkbox"/> Pesticides/fertilizers<br><input type="checkbox"/> Animals/livestock<br><input type="checkbox"/> Detergents/disinfectants<br><input type="checkbox"/> Fuels/solvents/paints<br><input type="checkbox"/> Other, specify:<br><input type="text"/>                          | <input type="checkbox"/> None<br><input type="checkbox"/> Pesticides/fertilizers<br><input type="checkbox"/> Animals/livestock<br><input type="checkbox"/> Detergents/disinfectants<br><input type="checkbox"/> Fuels/solvents/paints<br><input type="checkbox"/> Other, specify:<br><input type="text"/>                          | <input type="checkbox"/> None<br><input type="checkbox"/> Pesticides/fertilizers<br><input type="checkbox"/> Animals/livestock<br><input type="checkbox"/> Detergents/disinfectants<br><input type="checkbox"/> Fuels/solvents/paints<br><input type="checkbox"/> Other, specify:<br><input type="text"/>                          |  |  |  |  |                                                                                                                         |                    |  |  |  |  |  |                                                                                                                         |                    |  |  |  |  |  |
| 25. When exposed to chemicals at work, what percent (%) of that time did the operator use proper personal protection equipment (PPE) (apron, goggles, gloves)?                        | <table border="1"> <tr> <td colspan="3">Amount of Time (%)</td> </tr> <tr> <td></td> <td></td> <td></td> </tr> </table>                                                                                                                                                                                                            | Amount of Time (%)                                                                                                                                                                                                                                                                                                                 |                                                                                                                                                                                                                                                                                                                                    |  |  |  |  | <table border="1"> <tr> <td colspan="3">Amount of Time (%)</td> </tr> <tr> <td></td> <td></td> <td></td> </tr> </table> | Amount of Time (%) |  |  |  |  |  | <table border="1"> <tr> <td colspan="3">Amount of Time (%)</td> </tr> <tr> <td></td> <td></td> <td></td> </tr> </table> | Amount of Time (%) |  |  |  |  |  |
| Amount of Time (%)                                                                                                                                                                    |                                                                                                                                                                                                                                                                                                                                    |                                                                                                                                                                                                                                                                                                                                    |                                                                                                                                                                                                                                                                                                                                    |  |  |  |  |                                                                                                                         |                    |  |  |  |  |  |                                                                                                                         |                    |  |  |  |  |  |
|                                                                                                                                                                                       |                                                                                                                                                                                                                                                                                                                                    |                                                                                                                                                                                                                                                                                                                                    |                                                                                                                                                                                                                                                                                                                                    |  |  |  |  |                                                                                                                         |                    |  |  |  |  |  |                                                                                                                         |                    |  |  |  |  |  |
| Amount of Time (%)                                                                                                                                                                    |                                                                                                                                                                                                                                                                                                                                    |                                                                                                                                                                                                                                                                                                                                    |                                                                                                                                                                                                                                                                                                                                    |  |  |  |  |                                                                                                                         |                    |  |  |  |  |  |                                                                                                                         |                    |  |  |  |  |  |
|                                                                                                                                                                                       |                                                                                                                                                                                                                                                                                                                                    |                                                                                                                                                                                                                                                                                                                                    |                                                                                                                                                                                                                                                                                                                                    |  |  |  |  |                                                                                                                         |                    |  |  |  |  |  |                                                                                                                         |                    |  |  |  |  |  |
| Amount of Time (%)                                                                                                                                                                    |                                                                                                                                                                                                                                                                                                                                    |                                                                                                                                                                                                                                                                                                                                    |                                                                                                                                                                                                                                                                                                                                    |  |  |  |  |                                                                                                                         |                    |  |  |  |  |  |                                                                                                                         |                    |  |  |  |  |  |
|                                                                                                                                                                                       |                                                                                                                                                                                                                                                                                                                                    |                                                                                                                                                                                                                                                                                                                                    |                                                                                                                                                                                                                                                                                                                                    |  |  |  |  |                                                                                                                         |                    |  |  |  |  |  |                                                                                                                         |                    |  |  |  |  |  |
| 26. <b>Musculoskeletal exposures:</b><br>Was the operator exposed to any of the following situations at work during the past 12 months?<br>(Mark all that apply.)                     | <input type="checkbox"/> None<br><input type="checkbox"/> Forceful exertions<br><input type="checkbox"/> Repetitive tasks<br><input type="checkbox"/> Awkward postures<br><input type="checkbox"/> Frequent manual labor<br><input type="checkbox"/> Vibration<br><input type="checkbox"/> Other, specify:<br><input type="text"/> | <input type="checkbox"/> None<br><input type="checkbox"/> Forceful exertions<br><input type="checkbox"/> Repetitive tasks<br><input type="checkbox"/> Awkward postures<br><input type="checkbox"/> Frequent manual labor<br><input type="checkbox"/> Vibration<br><input type="checkbox"/> Other, specify:<br><input type="text"/> | <input type="checkbox"/> None<br><input type="checkbox"/> Forceful exertions<br><input type="checkbox"/> Repetitive tasks<br><input type="checkbox"/> Awkward postures<br><input type="checkbox"/> Frequent manual labor<br><input type="checkbox"/> Vibration<br><input type="checkbox"/> Other, specify:<br><input type="text"/> |  |  |  |  |                                                                                                                         |                    |  |  |  |  |  |                                                                                                                         |                    |  |  |  |  |  |
| 27. Was the operator using any of the following preventive techniques to maintain his/her musculoskeletal health during the past 12 months?<br>(Mark all that apply.)                 | <input type="checkbox"/> None<br><input type="checkbox"/> Regular breaks<br><input type="checkbox"/> Stretching<br><input type="checkbox"/> Exercising<br><input type="checkbox"/> Good lifting techniques<br><input type="checkbox"/> Mechanizing tasks<br><input type="checkbox"/> Other, specify:<br><input type="text"/>       | <input type="checkbox"/> None<br><input type="checkbox"/> Regular breaks<br><input type="checkbox"/> Stretching<br><input type="checkbox"/> Exercising<br><input type="checkbox"/> Good lifting techniques<br><input type="checkbox"/> Mechanizing tasks<br><input type="checkbox"/> Other, specify:<br><input type="text"/>       | <input type="checkbox"/> None<br><input type="checkbox"/> Regular breaks<br><input type="checkbox"/> Stretching<br><input type="checkbox"/> Exercising<br><input type="checkbox"/> Good lifting techniques<br><input type="checkbox"/> Mechanizing tasks<br><input type="checkbox"/> Other, specify:<br><input type="text"/>       |  |  |  |  |                                                                                                                         |                    |  |  |  |  |  |                                                                                                                         |                    |  |  |  |  |  |

**SECTION 7**

28. Respondent:

Date:  /  / 2020

29. Comments:

THANK YOU FOR COMPLETING THIS SURVEY.

Please review survey results from previous years at: <https://www.unmc.edu/publichealth/cscash/>

This survey is funded by the Centers for Disease Control and Prevention (CDC) award (U54-OH010162) to the Central States Center for Agricultural Safety and Health which is housed at the University of Nebraska Medical Center.
